# Supplementary material for: Oxygen administration during surgery and postoperative organ injury: observational cohort study
Source: PubMed Central journal article supplement — BMJ. 2022 Nov 30;379:e070941. doi: 10.1136/bmj-2022-070941 (PMC9710248; doi:10.1136/bmj-2022-070941), 2022-11-30
Supplement: mcid070941.ww.pdf [file mcid070941.ww.pdf]

## Supplement

### Oxygen administration during surgery and postoperative organ injury: observational cohort study

#### Contents

1. Power analysis
2. Alternative measurements of excess oxygen exposure
3. Supplementary Table 1. Diagnostic codes for perioperative lung injury
4. Supplementary Table 2. Diagnostic codes for appendicitis and pancreatitis
5. Supplementary Table 3. Procedural codes for identifying type of surgery
6. Supplementary Table 4. Association between organ injury, mortality, and length of stay
7. Supplementary Table 5. Associations between oxygen exposure and secondary outcomes
8. Supplementary Table 6. Adjusted estimates of the rates of acute kidney injury (AKI), myocardial injury, and lung injury for patients receiving 80% and 30% FIO<sub>2</sub>
9. Supplementary Figure 1. Causal pathway diagram depicting potential framework of associations
10. Supplementary Figure 2. Independent associations between intraoperative oxygen exposure and organ injury in models that were adjusted for covariates included in primary models and duration of surgery.
11. Protocol and statistical analysis plan

## 1. Power analysis

In a cohort of patients submitted to MPOG from Vanderbilt University Medical Center the incidence of AKI, myocardial injury, and lung injury was 11.4%, 1.7% and 3.2% respectively. Assuming an incidence of organ injury ranging between 1.5-11%, a sample of 300,000 patients would provide approximately 90% power to detect a 2-5% difference in odds of each of these outcomes, with type-1 error rate of 5%, when comparing patients stratified by the median  $AUC_{FIO_2}$ . This is based on unadjusted logistic regression with dichotomous exposure, a simplified but conservative version of the planned analysis.

## 2. Alternative measurements of excess oxygen exposure

The median (interquartile range)  $AUC_{FIO_2}$  was 7,690 (5,631-10,814) %•minutes when minutes during which the  $SpO_2$  was less than 96% were excluded from the calculation and 7,963 (5,880-11,124) %•minutes when minutes during which the  $SpO_2$  was less than 90% were excluded from the calculation. When excess oxygen was redefined as the AUC of  $FIO_2$  greater than 40%, the  $AUC_{FIO_2}$  was 3,971 (2,595-6,131) %•minutes.

### 3. Supplementary Table 1. Diagnostic codes for perioperative lung injury

| ICD-9  | ICD-10  | Diagnosis                                                                              |
|--------|---------|----------------------------------------------------------------------------------------|
| 518.51 |         | Acute resp failure following trauma and surgery                                        |
| 518.52 |         | Other pulmonary insufficiency, not elsewhere classified, following trauma and surgery  |
| 518.81 |         | Acute resp failure                                                                     |
| 518.84 |         | Acute and chronic resp failure                                                         |
|        | J80     | Acute respiratory distress syndrome                                                    |
|        | J95.1   | Acute pulmonary insufficiency following thoracic surgery                               |
|        | J95.2   | Acute pulmonary insufficiency following non-thoracic surgery                           |
|        | J95.821 | Acute postprocedural respiratory failure                                               |
|        | J95.822 | Acute and chronic postprocedural respiratory failure                                   |
|        | J96.00  | Acute respiratory failure, unspecified whether with hypoxia or hypercapnia             |
|        | J96.01  | Acute respiratory failure with hypoxia                                                 |
|        | J96.02  | Acute respiratory failure with hypercapnia                                             |
|        | J96.20  | Acute and chronic respiratory failure, unspecified whether with hypoxia or hypercapnia |
|        | J96.21  | Acute and chronic respiratory failure with hypoxia                                     |
|        | J96.22  | Acute and chronic respiratory failure with hypercapnia                                 |
|        | J96.90  | Respiratory failure, unspecified, unspecified whether with hypoxia or hypercapnia      |
|        | J96.91  | Respiratory failure, unspecified with hypoxia                                          |
|        | J96.92  | Respiratory failure, unspecified with hypercapnia                                      |

The lung injury endpoint was defined in the study cohort according to the presence of any one or more of these International Classification of Diseases, Ninth Revision/Tenth Revision (ICD-9 or ICD-10) codes, derived from hospital discharge diagnoses and complications data, and as endorsed by international consensus guidelines.<sup>1,2</sup> Selection of codes was based on the Agency for Healthcare Research and Quality (AHRQ) Patient Safety Indicator reports for postoperative respiratory failure and previously published large clinical studies that used registry data to study lung injury.<sup>3-7</sup>

#### References

1. Abbott TEF, Fowler AJ, Pelosi P, et al. A systematic review and consensus definitions for standardised end-points in perioperative medicine: pulmonary complications. *Br J Anaesth.* 2018;120(5):1066-1079. doi:10.1016/j.bja.2018.02.007
2. Jammer I, Wickboldt N, Sander M, et al. Standards for definitions and use of outcome measures for clinical effectiveness research in perioperative medicine: European Perioperative Clinical Outcome (EPCO) definitions: a statement from the ESA-ESICM joint taskforce on perioperative outcome measures. *Eur J Anaesthesiol.* 2015;32(2):88-105. doi:10.1097/EJA.000000000000118
3. Agency for Healthcare Research and Quality, U.S. Department of Health and Human Services (<https://www.qualityindicators.ahrq.gov/>). Patient Safety Indicator 11 (PSI 11) Postoperative Respiratory Failure Rate. AHRQ QI™ ICD-9-CM Specification Version 6.0: June 2017. Available at: [https://qualityindicators.ahrq.gov/Downloads/Modules/PSI/V60-ICD09/TechSpecs/PSI\\_11\\_Postoperative\\_Respiratory\\_Failure\\_Rate.pdf](https://qualityindicators.ahrq.gov/Downloads/Modules/PSI/V60-ICD09/TechSpecs/PSI_11_Postoperative_Respiratory_Failure_Rate.pdf). Accessed June 4, 2021.
4. Agency for Healthcare Research and Quality, U.S. Department of Health and Human Services (<https://www.qualityindicators.ahrq.gov/>). Patient Safety Indicator 11 (PSI 11) Postoperative Respiratory Failure Rate. AHRQ Quality Indicators™ (AHRQ QI™) ICD-10-CM/PCS Specification v2018: June 2018. Available at: [https://www.qualityindicators.ahrq.gov/Downloads/Modules/PSI/V2018/TechSpecs/PSI\\_11\\_Postoperative\\_Respiratory\\_Failure\\_Rate.pdf](https://www.qualityindicators.ahrq.gov/Downloads/Modules/PSI/V2018/TechSpecs/PSI_11_Postoperative_Respiratory_Failure_Rate.pdf). Accessed June 4, 2021.
5. Ladha K, Vidal Melo MF, McLean DJ, et al. Intraoperative protective mechanical ventilation and risk of postoperative respiratory complications: hospital based registry study. *BMJ.* 2015;351:h3646. doi:10.1136/bmj.h3646

6. Stocking JC, Utter GH, Drake C, et al. Postoperative respiratory failure: An update on the validity of the Agency for Healthcare Research and Quality Patient Safety Indicator 11 in an era of clinical documentation improvement programs. *Am J Surg*. 2020;220(1):222-228. doi:10.1016/j.amjsurg.2019.11.019
7. Kheterpal S, Vaughn MT, Dubovoy TZ, et al. Sugammadex versus Neostigmine for Reversal of Neuromuscular Blockade and Postoperative Pulmonary Complications (STRONGER): A Multicenter Matched Cohort Analysis. *Anesthesiology*. 2020;132(6):1371-1381. doi:10.1097/ALN.0000000000003256

#### 4. Supplementary Table 2. Diagnostic codes for stroke, appendicitis, and pancreatitis

| ICD-9 | ICD-10  | Diagnosis                                                                             |
|-------|---------|---------------------------------------------------------------------------------------|
| 43301 |         | Occlusion and stenosis of basilar artery with cerebral infarction                     |
| 43311 |         | Occlusion and stenosis of carotid artery with cerebral infarction                     |
| 43321 |         | Occlusion and stenosis of vertebral artery with cerebral infarction                   |
| 43331 |         | Occlusion and stenosis of multiple precerebral arteries with cerebral infarction      |
| 43381 |         | Occlusion and stenosis of other specified precerebral artery with cerebral infarction |
| 43391 |         | Occlusion and stenosis of unspecified precerebral artery with cerebral infarction     |
| 43401 |         | Cerebral thrombosis with infarction                                                   |
| 43411 |         | Cerebral embolism with infarction                                                     |
| 43491 |         | Cerebral artery occlusion, unspecified with cerebral infarction                       |
| 99702 |         | Iatrogenic cerebrovascular infarction or hemorrhage                                   |
|       | I63.0   | Cerebral infarction due to thrombosis of precerebral arteries                         |
|       | I63.1   | Cerebral infarction due to embolism of precerebral arteries                           |
|       | I63.2   | Cerebral infarction due to unspecified occlusion or stenosis of precerebral arteries  |
|       | I63.3   | Cerebral infarction due to thrombosis of cerebral arteries                            |
|       | I63.4   | Cerebral infarction due to embolism of cerebral arteries                              |
|       | I63.5   | Cerebral infarction due to unspecified occlusion or stenosis of cerebral arteries     |
|       | I63.6   | Cerebral infarction due to cerebral venous thrombosis                                 |
|       | I63.8   | Other cerebral infarction                                                             |
|       | I63.9   | Cerebral infarction, unspecified                                                      |
| 540.0 |         | Acute appendicitis with generalized peritonitis                                       |
| 540.1 |         | Acute appendicitis with peritoneal abscess                                            |
| 540.9 |         | Acute appendicitis without peritonitis                                                |
| 541   |         | Appendicitis unqualified                                                              |
| 542   |         | Other appendicitis                                                                    |
|       | K35     | Acute appendicitis with generalized peritonitis                                       |
|       | K35.2   | Acute appendicitis with peritoneal abscess                                            |
|       | K35.20  | Acute appendicitis without peritonitis                                                |
|       | K35.21  | Appendicitis unqualified                                                              |
|       | K35.3   | Other appendicitis                                                                    |
|       | K35.30  | Acute appendicitis                                                                    |
|       | K35.31  | Acute appendicitis with generalized peritonitis                                       |
|       | K35.32  | Acute appendicitis with generalized peritonitis without abscess                       |
|       | K35.33  | Acute appendicitis with generalized peritonitis with abscess                          |
|       | K35.8   | Acute appendicitis with localized peritonitis                                         |
|       | K35.80  | Acute appendicitis with localized peritonitis without perforation or gangrene         |
|       | K35.89  | Acute appendicitis with localized peritonitis and gangrene, without perforation       |
|       | K35.890 | Acute appendicitis with perforation and localized peritonitis, without abscess        |
|       | K35.891 | Acute appendicitis with perforation and localized peritonitis, with abscess           |
| 577.0 |         | Acute pancreatitis                                                                    |
|       | K85     | Acute pancreatitis                                                                    |
|       | K85.0   | Idiopathic acute pancreatitis                                                         |
|       | K85.00  | Idiopathic acute pancreatitis without necrosis or infection                           |
|       | K85.01  | Idiopathic acute pancreatitis with uninfected necrosis                                |
|       | K85.02  | Idiopathic acute pancreatitis with infected necrosis                                  |
|       | K85.1   | Biliary acute pancreatitis                                                            |
|       | K85.10  | Biliary acute pancreatitis without necrosis or infection                              |
|       | K85.11  | Biliary acute pancreatitis with uninfected necrosis                                   |
|       | K85.12  | Biliary acute pancreatitis with infected necrosis                                     |
|       | K85.3   | Drug induced acute pancreatitis                                                       |
|       | K85.30  | Drug induced acute pancreatitis without necrosis or infection                         |
|       | K85.31  | Drug induced acute pancreatitis with uninfected necrosis                              |
|       | K85.32  | Drug induced acute pancreatitis with infected necrosis                                |

|        |                                                               |
|--------|---------------------------------------------------------------|
| K85.8  | Other acute pancreatitis                                      |
| K85.80 | Other acute pancreatitis without necrosis or infection        |
| K85.81 | Other acute pancreatitis with uninfected necrosis             |
| K85.82 | Other acute pancreatitis with infected necrosis               |
| K85.9  | Acute pancreatitis, unspecified                               |
| K85.90 | Acute pancreatitis without necrosis or infection, unspecified |
| K85.91 | Acute pancreatitis with uninfected necrosis, unspecified      |
| K85.92 | Acute pancreatitis with infected necrosis, unspecified        |

---

**5. Supplementary Table 3.** Procedural categorization coding using primary anesthesia current procedural terminology (CPT) codes

| CPT code                                                                                                                                                                                                                                                                                                                  | Procedure body region/surgery type |
|---------------------------------------------------------------------------------------------------------------------------------------------------------------------------------------------------------------------------------------------------------------------------------------------------------------------------|------------------------------------|
| 00160, 00162, 00164, 00100, 00102, 00170, 00172, 00174, 00176, 00120, 00124, 00126, 00103, 00140, 00142, 00144, 00145, 00147, 00148, 00190, 00192, 00210, 00211, 00212, 00214, 00215, 00216, 00218, 00220, 00222, 00104                                                                                                   | Head                               |
| 00300, 00320, 00322, 00326, 00350, 00352                                                                                                                                                                                                                                                                                  | Neck                               |
| 00640, 00600, 00604, 00620, 00622, 00625, 00626, 00630, 00632, 00634, 00635, 00670                                                                                                                                                                                                                                        | Spine and spinal cord              |
| 00550, 00560, 00561, 00562, 00563, 00566, 00567, 00580                                                                                                                                                                                                                                                                    | Open heart                         |
| 00500, 00520, 00522, 00524, 00528, 00529, 00539, 00540, 00541, 00546, 00548, 00542, 00530, 00532, 00534, 00537                                                                                                                                                                                                            | Intrathoracic                      |
| 00400, 00410, 00402, 00404, 00406, 00450, 00452, 00454, 00470, 00472, 00474                                                                                                                                                                                                                                               | Extrathoracic                      |
| 00700, 00702, 00730, 00731, 00732, 00740, 00750, 00752, 00754, 00756, 00790, 00792, 00794, 00796, 00797, 00770                                                                                                                                                                                                            | Upper abdomen                      |
| 00800, 00802, 00820, 00810, 00811, 00812, 00813, 00830, 00832, 00834, 00836, 00840, 00844, 00848, 00866, 00902, 00904, 00880, 00882                                                                                                                                                                                       | Lower abdomen                      |
| 00842, 00948, 00950, 00952, 00846, 00851, 00942, 00944, 00906, 00940                                                                                                                                                                                                                                                      | Gynecologic                        |
| 01112, 01130, 01160, 01120, 01140, 01150, 01170, 01173, 01180, 01190                                                                                                                                                                                                                                                      | Pelvic                             |
| 00862, 00868, 00864, 00870, 00872, 00873, 00865, 00908, 00910, 00912, 00914, 00916, 00918, 00860                                                                                                                                                                                                                          | Urologic                           |
| 00921, 00922, 00924, 00926, 00928, 00930, 00932, 00934, 00936, 00938, 00920                                                                                                                                                                                                                                               | Male reproductive system           |
| 01200, 01220, 01340, 01380, 01390, 01420, 01462, 01490, 01202, 01210, 01212, 01214, 01215, 01230, 01232, 01234, 01250, 01320, 01360, 01382, 01392, 01400, 01402, 01404, 01464, 01470, 01472, 01474, 01480, 01482, 01484, 01486, 01260, 01270, 01272, 01274, 01430, 01432, 01440, 01442, 01444, 01500, 01502, 01520, 01522 | Lower extremity                    |
| 01620, 01680, 01682, 01730, 01820, 01860, 01610, 01622, 01630, 01634, 01636, 01638, 01710, 01712, 01714, 01716, 01732, 01740, 01742, 01744, 01756, 01758, 01760, 01810, 01829, 01830, 01832, 01650, 01652, 01654, 01656, 01670, 01770, 01772, 01780, 01782, 01840, 01842, 01844, 01850, 01852                             | Upper extremity                    |
| 01916, 01920, 01922, 01924, 01925, 01926, 01930, 01931, 01932, 01933, 01935, 01936                                                                                                                                                                                                                                        | Radiologic                         |
| 01951, 01952, 01953                                                                                                                                                                                                                                                                                                       | Burn                               |
| 01958, 01960, 01961, 01968, 01967, 01962, 01963, 01969, 01964, 01965, 01966                                                                                                                                                                                                                                               | Obstetric                          |
| 01990, 01991, 01992, 01995, 01996, 01999                                                                                                                                                                                                                                                                                  | Other                              |



6. **Supplementary Table 4.** Association between acute kidney injury (AKI), myocardial injury, and lung injury with 30-day mortality and hospital length of stay (hLOS)

|                     | AKI<br>n/N (%)      | No AKI<br>n/N (%)     | p-value |
|---------------------|---------------------|-----------------------|---------|
| 30-day mortality    | 615 / 18,349 (3.4%) | 1725 / 274,533 (0.6%) | <0.001  |
| h-LOS, median (IQR) | 5.0 (3.0, 9.0)      | 3.0 (1.0, 5.0)        | <0.001  |

  

|                     | Myocardial injury<br>n/N (%) | No myocardial injury<br>n/N (%) | p-value |
|---------------------|------------------------------|---------------------------------|---------|
| 30-day mortality    | 354 / 9,905 (3.6%)           | 1,705 / 285,277 (0.6%)          | <0.001  |
| h-LOS, median (IQR) | 6.0 (3.0, 11.0)              | 3.0 (1.0, 5.0)                  | <0.001  |

  

|                     | Lung injury<br>n/N (%) | No lung injury<br>n/N (%) | p-value |
|---------------------|------------------------|---------------------------|---------|
| 30-day mortality    | 1,352 / 12,860 (10.5%) | 1,121 / 299,116 (0.4%)    | <0.001  |
| h-LOS, median (IQR) | 9.0 (5.0, 19.0)        | 3.0 (1.0, 5.0)            | <0.001  |

**7. Supplementary Table 5.** Associations between intraoperative oxygen exposure and secondary outcomes. Event rates (%) are reported for categorical outcomes and 50th (25<sup>th</sup>, 75<sup>th</sup>) percentiles and number of eligible cases for length of stay (LOS). Estimates (95% confidence intervals) represent the odds ratio of stroke or mortality at 30 days or the difference in average hospital LOS between the 75th and the 25th percentiles of the intraoperative AUC<sub>FIO<sub>2</sub></sub>. P-values represent the statistical significance across the entire range of AUC<sub>FIO<sub>2</sub></sub>.

| Analysis                                       | Stroke                    | Estimate (95% CI)   | P-value | LOS (days)    | Estimate (95% CI)      | P-value | Mortality                 | Estimate (95% CI)   | P-value |
|------------------------------------------------|---------------------------|---------------------|---------|---------------|------------------------|---------|---------------------------|---------------------|---------|
| Primary analysis                               | 3,298 / 312,161<br>(1.1%) | 1.09 (1.05 to 1.13) | <0.001  | 3.0 (1.0-5.0) | -0.20 (-0.28 to -0.11) | <0.001  | 2,468 / 309,929<br>(0.8%) | 1.06 (0.98 to 1.15) | 0.04    |
| Sensitivity analyses - redefined exposure      |                           |                     |         |               |                        |         |                           |                     |         |
| Excluding minutes where SpO <sub>2</sub> <96%  | 3,298 / 312,161<br>(1.1%) | 1.09 (1.05 to 1.13) | <0.001  | 3.0 (1.0-5.0) | -0.15 (-0.23 to -0.07) | <0.001  | 2,468 / 309,929<br>(0.8%) | 1.02 (0.95 to 1.10) | 0.09    |
| Excluding minutes where SpO <sub>2</sub> <90%  | 3,298 / 312,161<br>(1.1%) | 1.10 (1.05 to 1.13) | <0.001  | 3.0 (1.0-5.0) | -0.18 (-0.27 to -0.10) | <0.001  | 2,468 / 309,929<br>(0.8%) | 1.06 (0.98 to 1.15) | 0.04    |
| Redefining excess FIO <sub>2</sub> as AUC >0.4 | 3,298 / 312,161<br>(1.1%) | 1.07 (1.04 to 1.11) | <0.001  | 3.0 (1.0-5.0) | 0.05 (-0.02 to 0.13)   | <0.001  | 2,468 / 309,929<br>(0.8%) | 1.11 (1.03 to 1.20) | 0.02    |
| Sensitivity analyses - cohort restriction      |                           |                     |         |               |                        |         |                           |                     |         |
| Excluding cases with any SpO <sub>2</sub> <96% | 2,153 / 204,626<br>(1.1%) | 1.11 (1.06 to 1.17) | <0.001  | 3.0 (1.0-5.0) | -0.21 (-0.31 to -0.10) | <0.001  | 1,499 / 205,004<br>(0.7%) | 1.10 (1.00 to 1.22) | 0.05    |
| Excluding cases with early mortality           | 3,298 / 305,848<br>(1.1%) | 1.09 (1.05 to 1.13) | <0.001  | 3.0 (1.0-5.0) | -0.21 (-0.29 to -0.12) | <0.001  | NA                        | NA                  | NA      |
| Excluding cardiac surgery cases                | 3,081 / 302,347<br>(1.0%) | 1.11 (1.06 to 1.15) | <0.001  | 3.0 (1.0-5.0) | -0.20 (-0.28 to -0.11) | <0.001  | 2,341 / 300,671<br>(0.8%) | 1.08 (1.00 to 1.17) | 0.17    |

All analyses were adjusted for age, sex, BMI, ASA status, AHRQ Elixhauser comorbidity index, chronic pulmonary disease, emergency surgery, preoperative serum creatinine, hemoglobin, troponin and lactate concentrations, nitrous oxide exposure, median intraoperative PEEP, volumes of intraoperative intravenous crystalloid and packed red blood cells administrations, and intraoperative hypotension. SpO<sub>2</sub>, arterial hemoglobin oxygen saturation; FIO<sub>2</sub>, fraction of inspired oxygen; NA, not applicable.

8. **Supplementary Table 6.** Estimates of the rates of acute kidney injury, myocardial injury, and lung injury for patients receiving 30% and 80% FIO<sub>2</sub>. Only 1% of cases received a median FIO<sub>2</sub> of 30% or less in this cohort, limiting accuracy of these estimates. Estimates were adjusted for all the covariates included in the primary analyses and duration of surgery.

|                     | Median FIO <sub>2</sub> 30% | Median FIO <sub>2</sub> 80% |
|---------------------|-----------------------------|-----------------------------|
| Acute kidney injury | 5.21% (4.80 to 5.67)        | 5.62% (5.29 to 5.97)        |
| Myocardial injury   | 1.83% (1.67 to 2.02)        | 2.02% (1.90 to 2.15)        |
| Lung injury         | 1.10% (1.00 to 1.17)        | 1.82% (1.72 to 1.92)        |

## 9. Supplementary Figure 1. Causal pathway diagram depicting potential framework of associations

**Causal pathway diagram.** Arrows depict potential relationships between factors, and directionality shows the temporal relations between factors. Baseline (preoperative) and intraoperative covariates were chosen for their potential to confound the measurement of the association between the primary exposure ( $AUC_{FIO_2}$ ) and postoperative organ injury outcomes (acute kidney injury, myocardial injury, lung injury, and other secondary endpoints).  $\beta$  captures the estimate of the association between the 75<sup>th</sup> and 25<sup>th</sup> percentile of  $AUC_{FIO_2}$  and organ injury, adjusted for baseline and intraoperative covariates. A sensitivity analysis was conducted that excluded intraoperative covariates (potential colliders) since the primary exposure could affect these factors. The impact of unmeasured potential confounders and unknown confounders is not accounted for in  $\beta$ ,  $AUC_{FIO_2}$ .

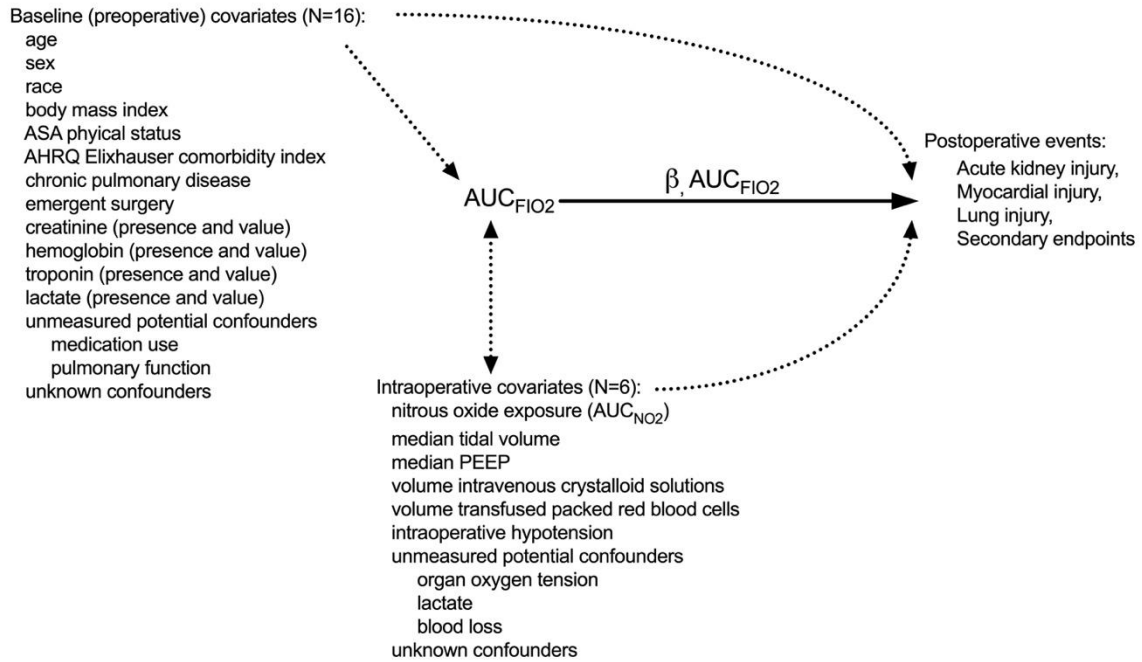

10. **Supplementary Figure 2.** Independent associations between intraoperative oxygen exposure and organ injury in models that were adjusted for covariates included in primary models and duration of surgery. **A.** acute kidney injury (AKI), **B.** myocardial injury, and **C.** lung injury. Tick marks on the x-axis identify each decile of cases.  $P < 0.001$  for each organ injury.

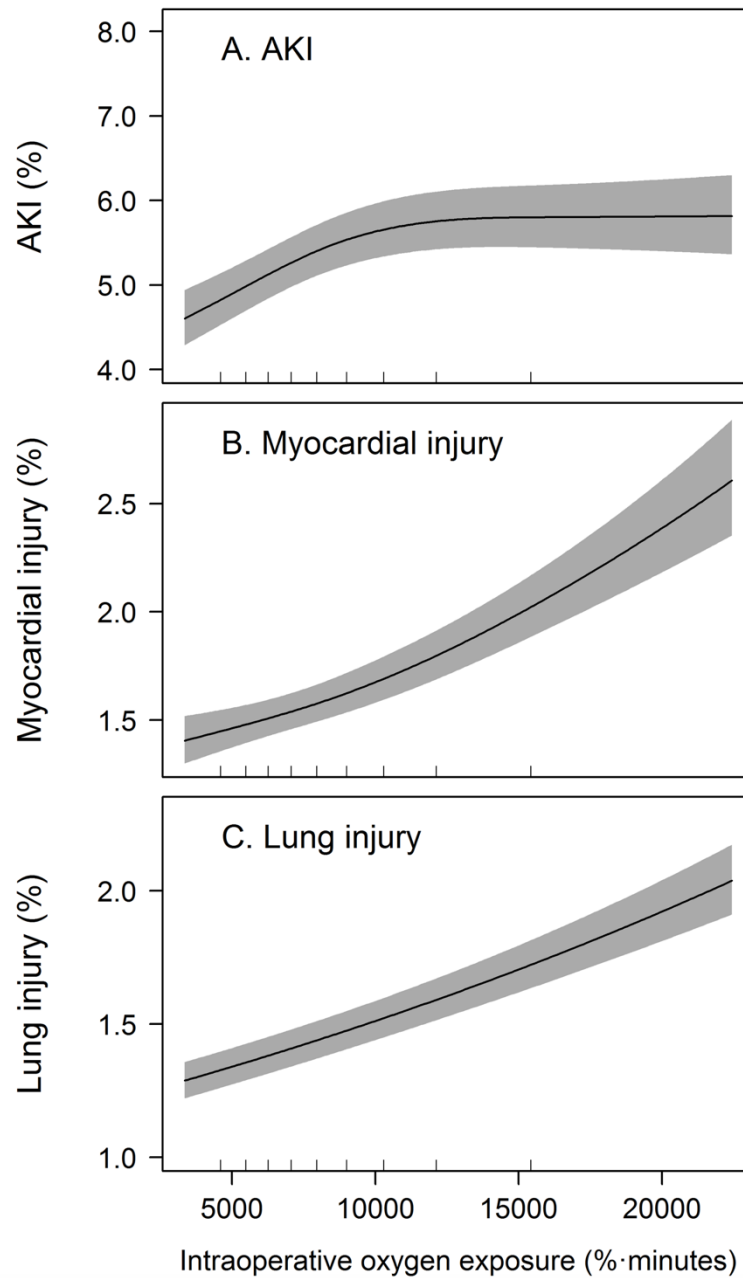

11. **Protocol** (as posted on Open-Source Framework 8/23/2020, [osf.io/cfd2m](https://osf.io/cfd2m))

|                                |                                                                                                                                                                                                                                                                                                                                                                                                                                                                                                                                                                                       |
|--------------------------------|---------------------------------------------------------------------------------------------------------------------------------------------------------------------------------------------------------------------------------------------------------------------------------------------------------------------------------------------------------------------------------------------------------------------------------------------------------------------------------------------------------------------------------------------------------------------------------------|
| Title:                         | Intraoperative oxygen exposure and postoperative outcomes                                                                                                                                                                                                                                                                                                                                                                                                                                                                                                                             |
| Principal Investigator:        | Frederic (Josh) Billings, Vanderbilt University                                                                                                                                                                                                                                                                                                                                                                                                                                                                                                                                       |
| Co-Investigators:              | David McIlroy, Vanderbilt University<br>Matthew Shotwell, Vanderbilt University<br>Marcos Lopez, Vanderbilt University<br>Joanna Olsen, Oregon Health Science University<br>Shelley Vaughn, University of Michigan<br>Jennifer Morse, Vanderbilt University<br>Jonathan Wanderer, Vanderbilt University<br>Matthew Semler, Vanderbilt University<br>Sachin Kheterpal, University of Michigan                                                                                                                                                                                          |
| Type of Study:                 | Multicenter observational cohort                                                                                                                                                                                                                                                                                                                                                                                                                                                                                                                                                      |
| IRB Status:                    | IRB Approved                                                                                                                                                                                                                                                                                                                                                                                                                                                                                                                                                                          |
| Aims:                          | The aims of this study are to: <ol style="list-style-type: none"> <li>1. Estimate patient intraoperative oxygen exposure across a large heterogenous cohort of medical centers, surgeries, and anesthesiologists.</li> <li>2. Test the hypothesis that excess intraoperative oxygen exposure is associated with an increased risk of postoperative kidney injury, myocardial injury, lung injury, and other secondary endpoints.</li> </ol>                                                                                                                                           |
| Patients/Participants:         | Adult patients receiving surgery at Multicenter Perioperative Outcomes Group (MPOG) participating medical centers with general anesthesia, tracheal intubation, and mechanical ventilation during surgery who are at increased risk of poor outcomes, defined as patients admitted to the hospital following surgery of at least two hours duration.                                                                                                                                                                                                                                  |
| Proposed statistical analysis: | We will estimate the odds of postoperative AKI, myocardial injury, and lung injury (three primary endpoints) associated with exposure to intraoperative hyperoxygenation. The exposure will be quantified as a primary definition of the area-under-the-curve (AUC) of the fraction of inspired oxygen (FIO <sub>2</sub> ) above 0.21 for minutes when the SpO <sub>2</sub> is >92%, using logistic regression and adjusted for potential confounders (variables assumed to be associated with intraoperative FIO <sub>2</sub> administration <i>and</i> postoperative organ injury). |

## INTRODUCTION

Oxygen is one of the most widely used therapies during anesthesia, but the optimal FIO<sub>2</sub> during surgery remains unknown. High FIO<sub>2</sub> has been thought to offer many advantages, including an improved safety margin for airway manipulation, increasing perioperative arterial and wound tissue oxygen tension to enhance oxidative killing by neutrophils (1,2), improved healing of anastomotic sites (3,4), and decreased postoperative nausea and vomiting (5,6). Hyperoxia, however, has also been found to have a host of adverse effects, including promotion of absorption atelectasis (7), direct lung toxicity (8), increased airway inflammation (9), impaired regulation of blood glucose (10), and changes in cardiac index and peripheral vascular resistance (11-13). Clinical data on the effect of intraoperative FIO<sub>2</sub> has been equally conflicting. Initial data suggested that hyperoxia may play a role in decreasing surgical site infections (3,4), although recent clinical trials have failed to confirm this effect (14-17), and the existing studies have a high level of heterogeneity and risk for bias (18,19). Data from the ICU and cardiology literature suggest that hyperoxia may have a harmful effect on patient outcomes. The Oxygen-ICU trial demonstrated a significant increase in mortality when ICU patients were randomized to hyperoxic PaO<sub>2</sub> values up to 150 mm Hg, a level considered conservative by intraoperative standards (20). The AVOID study randomized ST elevation myocardial infarction patients to a supplemental oxygen group vs. air and found increased infarction size, recurrent MI, and arrhythmias in the oxygenation group (21). The PROXI trial, in a post-hoc analysis, reported an increase in perioperative myocardial infarction and long-term mortality in patients exposed to high FIO<sub>2</sub> while undergoing cancer surgery (22,23). A recent large registry study examined over 70,000 patients undergoing non-cardiothoracic surgery and found a dose-dependent association between intraoperative FIO<sub>2</sub> and major respiratory complications, as well as 30-day mortality (24). The DETO2X-AMI trial, however, failed to demonstrate any differences in clinical outcomes between patients with acute myocardial infarctions provided 2 liters/minute nasal cannula oxygen vs. ambient air, despite significantly more hypoxemia events in the ambient air group (25). A best-practice strategy for administration of intraoperative FIO<sub>2</sub> remains unknown.

We will test the hypothesis that excess intraoperative oxygen administration is associated with postoperative kidney injury, myocardial injury, lung injury and secondary endpoints.

## METHODS

### Study design:

Multicenter observational cohort study

### Study sites:

Multicenter Perioperative Outcomes Group (MPOG) participating medical centers

### Study population:

The inclusion/exclusion criteria for the study are broad to capture a wide set of intraoperative oxygenation practices, a diverse patient population, and a patient population receiving a diverse set of surgical procedures. At the same time, we will exclude patients with known confounders (to limit indication bias).

### Inclusion criteria:

- 18 years of age or older
- Duration of surgery of at least 120 minutes

- General anesthesia with tracheal intubation and mechanical ventilation
- Surgery from January 1, 2016 through November 22nd, 2018

Exclusion criteria:

- Pregnancy
- Outpatient surgery, defined according to surgical scheduling (i.e., patients who are scheduled outpatient but then are admitted to the hospital remain excluded)
- Airway surgery or bronchoscopy, documented using procedural codes
- One-lung or jet ventilation, documented by anesthesiologist
- Preoperative tracheal intubation
- Infrequent documentation of oxygenation during a case defined as any intraoperative periods of 5 minutes or more in which there are no FIO<sub>2</sub> or SpO<sub>2</sub> measurements or less than 60 intraoperative FIO<sub>2</sub> or SpO<sub>2</sub> measurements during the case.
- Intraoperative arterial hemoglobin desaturation (SpO<sub>2</sub> <90% for more than three consecutive minutes), since these patients likely require a higher FIO<sub>2</sub> to maintain SpO<sub>2</sub> (i.e., high FIO<sub>2</sub> is needed to oxygenate Hb rather than excessive of that required to oxygenate Hb), and these patients likely have factors that will confound the association between higher FIO<sub>2</sub> and organ injury, factors that are independently associated with both need for increased FIO<sub>2</sub> and increased organ injury.
- Previous participation in the study within 90 days (i.e., repeat surgery)
- Renal replacement therapy (for the AKI outcome)
- No preoperative creatinine measurement (for the AKI outcome)
- Cardiac, pacemaker, defibrillator, cardiac ablation, or cardiac catheterization surgery (for the myocardial injury outcome)
- Preoperative myocardial injury, indicated by elevated preoperative troponin within 42 days prior to surgery (for the myocardial injury outcome)

**Primary definition of oxygen exposure (independent variable):**

We will measure intraoperative oxygen exposure using minute-to-minute FIO<sub>2</sub> and SpO<sub>2</sub> data. These data are part of current intraoperative vital sign data feeds into MPOG. FIO<sub>2</sub> data will be collected from intubation to extubation, or from intubation until out of room time for patients who are not extubated in the operating room. **Oxygen exposure will be quantified as the AUC of FIO<sub>2</sub> above 0.21 (air) during surgery for minutes when the corresponding SpO<sub>2</sub> is greater than 92%.** We will exclude the FIO<sub>2</sub> for minutes when the oxygen saturation is less than or equal to 92% in the area under the AUC calculation because we seek to quantify **excess oxygen delivery** as opposed to necessary oxygen delivery. We will also conduct a sensitivity analysis to further address potential confounding by indication, during which we will exclude cases in which patients have had any SpO<sub>2</sub> less than 96%, since anesthesiologists may increase FIO<sub>2</sub> following a decrease in SpO<sub>2</sub> and not subsequently decrease FIO<sub>2</sub> after SpO<sub>2</sub> increases.

For minutes when the FIO<sub>2</sub> is not available, we will assign the FIO<sub>2</sub> as the mean between the previous value and the subsequent value if the missing period is  $\leq$  five minutes. If there is no FIO<sub>2</sub> measurement for more than five minutes, the case will be excluded. Likewise, for minutes when the SpO<sub>2</sub> is not available, we will assign the SpO<sub>2</sub> as the mean between the previous value and the subsequent value if the missing period is  $\leq$  five minutes. If there is no SpO<sub>2</sub> measurement for more than five minutes, the case will be excluded.

**Outcomes:**



Primary endpoints of the study are three metrics of specific organ injury that may reflect oxygen toxicity or oxygen debt and include:

- Acute kidney injury (**AKI**), defined using the creatinine criteria of KDIGO consensus criteria (26). Stage I AKI is a 0.3 mg/dl creatinine increase within 48 hours of surgery or 50% increase within 7 days of surgery, stage II is a 100% increase within 7 days, and stage III is a 200% increase, increase to greater than 4.0 mg/dl, or initiation of dialysis within 7 days of surgery. The AKI endpoint will be defined as AKI as any of stage.
- Myocardial injury in patients undergoing non-cardiac surgery (**MINS**), defined as plasma concentrations of troponin I > 0.04 ng/ml within 72 hours of surgery(27).
- **Lung injury**, defined by the presence of International Classification of Diseases, Ninth Revision/Tenth Revision (ICD-9 or ICD-10) lung injury codes, derived from hospital discharge diagnoses and complications data, and as endorsed by international consensus guidelines (**Table 1**)(28,29). Selection of codes was based on previously published agency for healthcare research and quality (AHRQ) Patient Safety Indicator reports for postoperative respiratory failure and previously published clinical studies that used registry data to study postoperative lung injury (30-33).

Secondary endpoints include:

- 30-day mortality
- Length of stay, defined as the number of days from day of surgery to day of discharge including the day of surgery and the day of discharge

For those patients discharged from hospital prior to completion of the prespecified temporal window for definition of each individual organ injury (i.e. <7 days for AKI; <72 hours for MINS), we will assume they did not develop this organ injury following hospital discharge. We will collect additional patient characteristics to describe the cohort and covariates for adjusted analyses as described below.

Pre-operative variables collected will be age, sex, BMI, ASA physical status classification, past medical history including diagnosis of heart failure, diabetes, chronic pulmonary disease, and other medical conditions using the Elixhauser comorbidity list and baseline labs including hematocrit, creatinine, lactate, and troponin measured prior to surgery.

We will record the specific surgery for each patient, the surgery type, and whether the surgery was emergent.

Intraoperative data collected will include minute-to-minute FIO<sub>2</sub>, minute-to-minute SpO<sub>2</sub>, minute-to-minute fraction of inspired nitrous oxide, duration of anesthesia, total fluid administration, total packed red blood cell transfusion, intraoperative hypotension, median intraoperative PEEP and TV per kg IBW. Definitions for these variables are outlined in **Table 2**. Postoperative data used to calculate organ injury include creatinine, troponin I, discharge and mortality data, and diagnosis codes.

### **Preliminary data to estimate Power and Sample Size:**

To estimate power and sample size to complete this study and accomplish the Aims above, we queried the MPOG database and calculated numbers of existing eligible patients, assessed current intraoperative oxygenation practices, and estimated organ injury in a subset of MPOG centers. In these centers, we examined all cases from adult patients who received surgery from 1/1/2016 to 12/31/2017 with general anesthesia for at least one hour, were admitted to the hospital postoperatively, and had serum basic metabolic panel measured preoperatively and postoperatively. We excluded cases from patients who were pregnant or who underwent procedures on the trachea or bronchus. A total of 137,497 cases from 103,398

patients met these inclusion/exclusion criteria. These patients received the full spectrum of surgical procedures including neurologic, ENT, cardiac, trauma, orthopedic, burn, intra-abdominal, urologic, gynecologic, and transplant surgery performed at these medical centers.

AKI affected 15,690 of these cases (11.4%). Specifically, KDIGO stage 1 AKI was diagnosed in 12,380 cases (9.0%), stage 2 AKI in 2386 (1.7%), and stage 3 in 924 cases (0.7%).

Clinicians ordered a cardiac troponin I within 72 hours of surgery in 19,370 cases (14.1%) either to evaluate suspected myocardial injury/infarction or for surveillance purposes. In the subset of patients submitted from Vanderbilt University Medical Center in 2017 (N=19,169) the median (25th, 75th percentile) age was 56 years (42, 67), and 45.1% were female. The 10th, 25th, 50th, 75th, and 90th administered FIO<sub>2</sub> was 0.50, 0.54, 0.58, 0.82, and 0.96, and the 10th, 25th, 50th, 75th, and 90th SpO<sub>2</sub> was 96%, 98%, 99%, 100%, and 100%. Myocardial injury (troponin I > 0.04 ng/ml within 72 hours of surgery) was diagnosed in 319 of the 19,169 patients (1.7%) in which it was measured. In addition, 140 (0.7%) died during hospitalization following surgery.

Lung injury was diagnosed in 3.2% of cases using AHRQ criteria.

If AKI, MINS, and lung injury affect between 11% and 1.5% of patients in the current study, with a two-sided test and type I error rate of 1%, 300,000 patients will provide approximately 90% power to detect a 5% to 12.5% difference in the odds of each of these organ injuries (AKI, MI, or lung injury), when comparing patients stratified by the median AUC of FIO<sub>2</sub> above 0.21 during surgery. This approximate power analysis is based on unadjusted logistic regression with dichotomous exposure, which is a simplified but conservative version of the planned analysis. The data in the planned study provide an excellent opportunity to measure the effect of intervention overall, but also affords the opportunity for robust analyses of heterogeneity of treatment effect in important subgroups (outlined in statistical analyses plan below).

### **Data Checking:**

Quantile and tabular summaries will be computed for all analysis variables and reviewed by a clinical expert to assess for inconsistent or nonsensical values, and to evaluate the plausibility of extreme values. For each variable, we set validity criteria prior to statistical analysis (**Table 3**). Values that do not meet the validity criteria will be considered missing.

### **Missing Data:**

In computing the primary exposure variable (AUC of FIO<sub>2</sub> above 0.21 during surgery), missing FIO<sub>2</sub> data will be imputed or cases excluded as described in the “Definition of oxygen exposure” section above.

For each of the outcomes of interest, only centers who reported the outcome will be included in the analysis for that outcome. Within centers providing data for each outcome, we will assign patients without outcome data as not having the event as follows: patients without creatinine or myocardial enzyme data will be considered not to have suffered AKI or myocardial injury, respectively, based on the assumption that these labs were not measured because there was no indication for monitoring or clinical suspicion of AKI or myocardial injury. Similarly, when preoperative hemoglobin, creatinine, lactate, and troponin are treated as potential confounders, we will additionally condition on the indicator variable that takes value one when the lab is measured, and zero otherwise. Patients with missing length of stay will be excluded from analysis of that outcome.

As a sensitivity analysis (see Statistical Analyses section) we will exclude patients who lack outcome data from analysis of that outcome. This will reduce the number of patients in the cohort and bias the results to only those who have outcomes measured, but it

will also restrict the analysis to a better phenotyped subgroup and reduce the effects of outcome misclassification. We will not assign any patient as having experienced an event unless there is documentation of that event.

Notwithstanding the methods described above, missingness in potential confounding variables, including perioperative laboratory measurements, will be addressed using multiple imputation. The chained equations method with predictive mean matching (PMM) will be used to generate five complete datasets. Statistical analyses will be implemented separately for each completed dataset and the results pooled using Rubin's rules.

### **Provider Practice Variation in FIO<sub>2</sub> Administration:**

We anticipate that the observed variation in delivered FIO<sub>2</sub> may be explained in part by patient-level factors and also in part by physician-level factors. Some anesthesiologists may typically administer a higher or lower FIO<sub>2</sub> than other anesthesiologists, independent of patient factors. Unlike variation in FIO<sub>2</sub> delivery that is driven by patient characteristics, variation in FIO<sub>2</sub> delivery by providers that is unrelated to patient characteristics may strengthen analysis of a causal pathway between excess FIO<sub>2</sub> and outcomes by providing opportunity to conduct an *instrumental variable analysis*. An instrumental variable analysis will mitigate the effect of indication bias and help assess the robustness of the findings of the primary analysis.

The instrumental variable analysis will leverage variation in provider practice while testing the hypothesis that intraoperative FIO<sub>2</sub> is associated with postoperative organ injury. The instrumental variable will be the provider's FIO<sub>2</sub> prescribing practice. We will calculate this variable by measuring the median FIO<sub>2</sub> for each case then calculate the median of these values across all the cases for each provider. Additional details of the instrumental variable analysis are provided in the following section.

### **Statistical Analyses:**

We will use multivariable logistic regression for analysis of the primary endpoint where the independent variable of interest will be intraoperative hyperoxygenation, quantified as the area-under-the-curve (AUC) of FIO<sub>2</sub> above 0.21 for intraoperative minutes when the SpO<sub>2</sub> was >92%. The model will also adjust for *a priori* determined potential confounders of the association between intraoperative FIO<sub>2</sub> administration and postoperative organ injury. These potential confounders include age, sex, BMI, ASA status, AHRQ Elixhauser Comorbidity Index (34), chronic pulmonary disease, emergency surgery, preoperative hemoglobin concentration and its "ordered" indicator (as described in the Missing Data section), preoperative creatinine concentration and its "ordered" indicator, preoperative troponin concentration and its "ordered" indicator, preoperative lactate concentration and its "ordered" indicator, nitrous oxide exposure (quantified as the AUC for intraoperative fraction of inhaled nitrous oxide, measured in a similar manner as FIO<sub>2</sub>), median intraoperative PEEP, intraoperative fluid and blood administration, and intraoperative hypotension (see Table 2). We will use indicator variables for the preoperative labs used as covariates including hemoglobin, creatinine, troponin, and lactate because many cases will not have one or more of these labs associated with it, and the decision to order one or more of the labs (indication for ordering) may be associated with intraoperative oxygen administration and outcomes. Even though there may be a significant degree of missingness for some of these labs, we do not want to exclude them as covariates because they could confound the relationship between oxygen exposure and organ injury.

The effects of quantitative covariates will be modeled using a flexible splines method. Quantitative and graphical regression diagnostics will be examined. In the event that the fully adjusted regression model is not estimable, or when there is other evidence of overfitting, the

model complexity will be reduced by omitting terms (beginning with nonlinear terms), by categorizing or grouping variables, or by using a regularization technique (e.g., LASSO). Results for the primary endpoints will be presented as odds ratios comparing the 75<sup>th</sup> versus 25<sup>th</sup> percentile of the primary exposure variable, with 95% confidence intervals.

**Pre-specified sensitivity analyses** will include **1)** varying the metric of oxygen exposure, **2)** restricting the cohort for analysis based on data density and specific subgroups, and **3)** an instrumental variable (attending anesthesiologist) analysis:

1. Varying the metric of oxygen exposure. It is recognized that oxygen exposure may have been varied according to degrees of observed hypoxemia and other unidentified factors that may impact our outcomes of interest (confounding by indication). Moreover, it remains unknown if any toxicity associated with excess oxygen exposure is dependent on the partial pressure of oxygen within the alveolus (PAO<sub>2</sub>) or within the arterial circulation (PaO<sub>2</sub>) Therefore, in addition to our primary calculation of oxygen exposure as the AUC of FIO<sub>2</sub> above 0.21 (air) during surgery – excluding those minutes where SpO<sub>2</sub> <92% , we will re-calculate oxygen exposure as:
  - AUC of FIO<sub>2</sub> above 0.21 (air) during surgery – excluding those minutes where SpO<sub>2</sub> <96%. The rationale for this is that an SpO<sub>2</sub> <96% likely reflects a PaO<sub>2</sub> that is also <100 mmHg, and clinicians may increase FIO<sub>2</sub> if SpO<sub>2</sub> <96% even though the patient is not hypoxic. While variations in FiO<sub>2</sub> during these periods may reflect hyperoxia within the alveoli (PAO<sub>2</sub>) it is unlikely that hyperoxemia of the blood reaching other organs was simultaneously present. In contrast, a hyperoxic inspired gas in the presence of an observed SpO<sub>2</sub> <96% is consistent with true hyperoxemia of blood being delivered to other organs.
  - AUC of FIO<sub>2</sub> above 0.21 (air) during surgery – excluding those minutes where SpO<sub>2</sub> <90%. The rationale for this is that an SpO<sub>2</sub> <90% likely reflects the oxygen content of arterial blood reaching the steep part of classical Hb-O<sub>2</sub> dissociation curve where further hemoglobin desaturation may significantly compromise tissue O<sub>2</sub> delivery, and because clinicians will most likely increase FIO<sub>2</sub> if the SpO<sub>2</sub> decreases below 90%. Increased FIO<sub>2</sub> in this context is not oxygenation in excess of that needed to maintain hemoglobin saturation, rather it is FIO<sub>2</sub> required to oxygenate hemoglobin. Increasing FIO<sub>2</sub> and oxygen delivery in this context may be considered non-modifiable due to the risk of end-organ hypoxia.
  - We will also explore the association between hyperoxia and organ injury under an alternative FIO<sub>2</sub> threshold of 0.4, measuring the AUC of FIO<sub>2</sub> above 0.4.
2. Restricting the cohort for analysis
  - We will exclude patients for each organ injury who died within the diagnostic window for that organ injury AND did not first develop the organ injury prior to death, to account for the potential competing risk of “early” death. Specifically, some patients may die prior to completion of the prespecified temporal window for the definition of each specific individual organ injury (i.e. <7 days for AKI; <72 hours for MINS; duration of hospitalization for ALI). By excluding these patients, the competing risk between “early” death and each organ-specific injury is eliminated, while retaining the full spectrum of severity of organ injury including organ injury that culminates in mortality. This analysis may produce a purer effect estimate of the association between hyperoxygenation and each organ-specific injury than what could be achieved with a composite of organ injury or death (another technique that addresses competing risk of early death).

- We will repeat the analysis for each outcome after excluding all patients in which that outcome is not measured to address the potential effect of ascertainment bias (as referenced in the Missing Data section).
  - We will exclude all patients who had any oxygen desaturation during maintenance anesthesia, defined as any SpO<sub>2</sub><96% that occurred exclusive of induction (defined as the first 15 minutes of the case) and emergence (defined as the last 15 minutes of the case) of anesthesia. Although we have already excluded FIO<sub>2</sub> data when SpO<sub>2</sub><93% from the calculation of “excess oxygen exposure” (reflecting that the higher FIO<sub>2</sub> may be clinically indicated during these periods), it is plausible that clinicians who increased FIO<sub>2</sub> in response to a desaturation may continue to administer an increased FIO<sub>2</sub> even after SpO<sub>2</sub> subsequently increases, potentially creating residual and unrecognized confounding by indication in patients who experienced even a brief intraoperative oxygen desaturation.
  - We will conduct additional pre-specified subgroup analyses for the primary outcomes (AKI, MINS, and lung injury) according to age (patients separated into those <50 years old, those 50-70, and those >70), sex, diabetes, preoperative hemoglobin concentration (patients separated into those <10 g/dl, 10-12.5, and >12.5), procedure type (patients separated by surgery body region/type (see **Table 4**), and duration of surgery (patients separated into those whose surgery is 120-180 minutes duration, 180-240, and greater than 240 minutes). The subgroup analysis according to duration of surgery will facilitate an exploration of the temporal component of any observed risk between cumulative hyperoxic exposure and adverse outcomes to better understand whether short-duration high-intensity hyperoxia should be considered an equivalent exposure to long-duration low-intensity hyperoxia. Subgroup analysis according to duration of surgery will also allow us to explore the potential confounding effect of surgery duration on the association between FIO<sub>2</sub> AUC and outcomes. We will examine if these factors modify any association between oxygen exposure and outcomes.
3. Anesthesiologist instrumental variable analysis
- We will additionally implement the primary analysis using an instrumental variable method. The instrument will be the typical FIO<sub>2</sub> for each anesthesiologist (see FIO<sub>2</sub> Administration Practice Patterns and Provider Clustering section above). We will use the two-stage predictor substitution (2SPS) method. In the first stage we will regress the measured FIO<sub>2</sub> AUC values onto the typical median FIO<sub>2</sub> values for each provider (i.e., the median FIO<sub>2</sub> across all cases for the provider of the median FIO<sub>2</sub> within each case, as described above). In the second stage, the predicted FIO<sub>2</sub> AUC from the first stage will be substituted for the measured FIO<sub>2</sub> AUC in the primary analysis.

Secondary endpoints will be evaluated using linear, logistic, proportional hazards, and cumulative logit regression methods as appropriate, but otherwise similar to the analysis of the primary endpoint.

Finally, to partially examine the clinical relevance of kidney injury, myocardial injury, and lung injury, we will evaluate the associations between these outcomes with 30-day mortality and hospital length of stay.

### **Limitations:**

The major limitation of this study is the indication bias for intraoperative FIO<sub>2</sub>. We will attempt to control this limitation by eliminating FIO<sub>2</sub> data from the AUC calculation of oxygen exposure when the SpO<sub>2</sub> is < 92% (and by eliminating FIO<sub>2</sub> data from the AUC

calculation of oxygen exposure when the SpO<sub>2</sub> is < 90% or < 96% in sensitivity analyses), eliminating cases in which the SpO<sub>2</sub> is < 90% for three or more minutes, adjusting for confounders associated with FIO<sub>2</sub> and outcomes in our analyses, performing a sensitivity analysis in patients who never had any SpO<sub>2</sub> < 96%, and conducting an instrumental variable sensitivity analysis.

**Table 1.** ICD-9/10 codes used to identify patients with lung injury

| <b>ICD-9</b> | <b>ICD-10</b> | <b>Diagnosis</b>                                                                  |
|--------------|---------------|-----------------------------------------------------------------------------------|
| 518.51       |               | Acute respiratory failure following trauma and surgery                            |
| 518.52       |               | Pulmonary insufficiency following trauma and surgery                              |
| 518.81       |               | Acute respiratory failure                                                         |
| 518.84       |               | Acute and chronic respiratory failure                                             |
|              | J80           | Acute respiratory distress syndrome                                               |
|              | J95.1         | Acute pulmonary insufficiency following thoracic surgery                          |
|              | J95.2         | Acute pulmonary insufficiency following non-thoracic surgery                      |
|              | J95.821       | Acute postprocedural respiratory failure                                          |
|              | J95.822       | Acute and chronic postprocedural respiratory failure                              |
|              | J96.00        | Acute respiratory failure, unspecified whether with hypoxia or hypercapnia        |
|              | J96.01        | Acute respiratory failure with hypoxia                                            |
|              | J96.02        | Acute respiratory failure with hypercapnia                                        |
|              | J96.20        | Acute and chronic respiratory failure, unspecified whether with hypoxia or        |
|              | J96.21        | Acute and chronic respiratory failure, with hypoxia                               |
|              | J96.22        | Acute and chronic respiratory failure, with hypercapnia                           |
|              | J96.90        | Respiratory failure, unspecified, unspecified whether with hypoxia or hypercapnia |
|              | J96.91        | Respiratory failure, unspecified with hypoxia                                     |
|              | J96.92        | Respiratory failure, unspecified with hypercapnia                                 |

**Table 2.** Intraoperative characteristic definitions

| <b>Variable</b>                       | <b>Definition</b>                                 | <b>Description</b>                                                                                                                               |
|---------------------------------------|---------------------------------------------------|--------------------------------------------------------------------------------------------------------------------------------------------------|
| Duration of procedure                 | Total procedure time                              | Total minutes from in room to out of room                                                                                                        |
| Fluid administration                  | ml of crystalloid                                 | Total ml of crystalloid fluids                                                                                                                   |
| Blood transfusion                     | ml of packed red blood cells transfused           | Total ml of packed red blood cells transfused                                                                                                    |
| Intraoperative hypotension            | AUC of MAP <60 mmHg                               | AUC of MAP<60 mm Hg                                                                                                                              |
| Measured Tidal Volume                 | TV in mL/kg/IBW                                   | Median intraoperative TV in mL/kg/IBW                                                                                                            |
| PEEP- measured                        | Median intraoperative PEEP                        | Median intraoperative PEEP in cm of H <sub>2</sub> O                                                                                             |
| FIO <sub>2</sub>                      | Intraoperative fraction of inspired oxygen        | Minute to minute FIO <sub>2</sub> from intubation to extubation, or out of operative room for patients who remain intubated                      |
| Oxygen Saturation (SpO <sub>2</sub> ) | Intraoperative oxygen saturation                  | Minute to minute arterial hemoglobin oxygen saturation from intubation to extubation, or out of operative room for patients who remain intubated |
| Nitrous Oxide administration          | Amount of nitrous oxide used for duration of case | AUC of intraoperative nitrous use (% minutes)                                                                                                    |



**Table 3.** Lower and upper thresholds for continuous variables used in regression modeling. Values outside of these thresholds set to missing.

| <b>Variable</b>                    | <b>Lower Threshold</b> | <b>Upper Threshold</b> |
|------------------------------------|------------------------|------------------------|
| Age (years)                        | 18                     | 125                    |
| BMI (kg/m <sup>2</sup> )           | 14                     | 80                     |
| Creatinine, baseline (mg/dl)       | 0.20                   | 15.00                  |
| Hemoglobin, baseline (g/dl)        | 4.0                    | 20.0                   |
| Hematocrit, baseline (%)           | 12.0                   | 60.0                   |
| Total crystalloid equivalents (ml) | 1                      | 25000                  |
| pRBC, intraop (ml)                 | 0                      | 30000                  |
| Length of stay (days)              | 1.00                   | 500                    |
| Peep (cm H <sub>2</sub> O)         | 0.00                   | 30.00                  |
| Troponin, preop (ng/ml)            | 0.00                   | 500                    |
| Lactate, preop (mmol/l)            | 0.00                   | 30                     |
| Case duration (minutes)            | 120                    | 1440                   |
| AHRQ Elixhauser Comorbidity Index  | -32.00                 | 99.00                  |

**Table 4.** Categories of procedures

| <b>Category</b>           | <b>Grouping</b>    |
|---------------------------|--------------------|
| Head                      | Peripheral/Other   |
| Neck                      | Peripheral/Other   |
| Thoracic - Extrathoracic  | Thoracic/Abdominal |
| Thoracic - Intrathoracic  | Thoracic/Abdominal |
| Abdominal – Upper abdomen | Thoracic/Abdominal |
| Abdominal – Lower abdomen | Thoracic/Abdominal |
| Perineum                  | Peripheral/Other   |
| Pelvis                    | Peripheral/Other   |
| Upper and lower extremity | Peripheral/Other   |
| Spine/Cord                | Peripheral/Other   |
| Other                     | Peripheral/Other   |

## References:

1. Babior, B. M. (1978) Oxygen-dependent microbial killing by phagocytes (first of two parts). *N Engl J Med* **298**, 659-668
2. Greif, R., Akca, O., Horn, E. P., Kurz, A., Sessler, D. I., and Outcomes Research, G. (2000) Supplemental perioperative oxygen to reduce the incidence of surgical-wound infection. *N Engl J Med* **342**, 161-167
3. Belda, F. J., Aguilera, L., Garcia de la Asuncion, J., Alberti, J., Vicente, R., Ferrandiz, L., Rodriguez, R., Company, R., Sessler, D. I., Aguilar, G., Botello, S. G., Orti, R., and Spanish Reduccion de la Tasa de Infeccion Quirurgica, G. (2005) Supplemental perioperative oxygen and the risk of surgical wound infection: a randomized controlled trial. *JAMA* **294**, 2035-2042
4. Garcia-Botello, S. A., Garcia-Granero, E., Lillo, R., Lopez-Mozos, F., Millan, M., and Lledo, S. (2006) Randomized clinical trial to evaluate the effects of perioperative supplemental oxygen administration on the colorectal anastomosis. *Br J Surg* **93**, 698-706
5. Greif, R., Laciny, S., Rapf, B., Hickie, R. S., and Sessler, D. I. (1999) Supplemental oxygen reduces the incidence of postoperative nausea and vomiting. *Anesthesiology* **91**, 1246-1252
6. Turan, A., Apfel, C. C., Kumpch, M., Danzeisen, O., Eberhart, L. H., Forst, H., Heringhaus, C., Isselhorst, C., Trenkler, S., Trick, M., Vedder, I., and Kerger, H. (2006) Does the efficacy of supplemental oxygen for the prevention of postoperative nausea and vomiting depend on the measured outcome, observational period or site of surgery? *Anaesthesia* **61**, 628-633
7. Carvalho, C. R., de Paula Pinto Schettino, G., Maranhao, B., and Bethlem, E. P. (1998) Hyperoxia and lung disease. *Curr Opin Pulm Med* **4**, 300-304
8. Kallet, R. H., and Matthay, M. A. (2013) Hyperoxic acute lung injury. *Respir Care* **58**, 123-141
9. Carpagnano, G. E., Kharitonov, S. A., Foschino-Barbaro, M. P., Resta, O., Gramiccioni, E., and Barnes, P. J. (2004) Supplementary oxygen in healthy subjects and those with COPD increases oxidative stress and airway inflammation. *Thorax* **59**, 1016-1019
10. Hals, I., Ohki, T., Singh, R., Ma, Z., Bjorklund, A., Balasuriya, C., Scholz, H., and Grill, V. (2017) Hyperoxia reduces insulin release and induces mitochondrial dysfunction with possible implications for hyperoxic treatment of neonates. *Physiol Rep* **5**
11. Harten, J. M., Anderson, K. J., Angerson, W. J., Booth, M. G., and Kinsella, J. (2003) The effect of normobaric hyperoxia on cardiac index in healthy awake volunteers. *Anaesthesia* **58**, 885-888
12. Anderson, K. J., Harten, J. M., Booth, M. G., and Kinsella, J. (2005) The cardiovascular effects of inspired oxygen fraction in anaesthetized patients. *Eur J Anaesthesiol* **22**, 420-425
13. McNulty, P. H., Robertson, B. J., Tulli, M. A., Hess, J., Harach, L. A., Scott, S., and Sinoway, L. I. (2007) Effect of hyperoxia and vitamin C on coronary blood flow in patients with ischemic heart disease. *J Appl Physiol (1985)* **102**, 2040-2045
14. Meyhoff, C. S., Wetterslev, J., Jorgensen, L. N., Henneberg, S. W., Hogdall, C., Lundvall, L., Svendsen, P. E., Mollerup, H., Lunn, T. H., Simonsen, I., Martinsen, K. R., Pulawska, T., Bundgaard, L., Bugge, L., Hansen, E. G., Riber, C., Gocht-Jensen, P., Walker, L. R., Bendtsen, A., Johansson, G., Skovgaard, N., Helto, K., Poukinski, A., Korshin, A., Walli, A., Bulut, M., Carlsson, P. S., Rodt, S. A., Lundbeck, L. B., Rask, H., Buch, N., Perdawid, S. K., Reza, J., Jensen, K. V., Carlsen, C. G., Jensen, F. S., Rasmussen, L. S., and Group, P. T. (2009) Effect of high perioperative oxygen fraction on surgical site infection and pulmonary complications after abdominal surgery: the PROXI randomized clinical trial. *JAMA* **302**, 1543-1550

15. Mayzler, O., Weksler, N., Domchik, S., Klein, M., Mizrahi, S., and Gurman, G. M. (2005) Does supplemental perioperative oxygen administration reduce the incidence of wound infection in elective colorectal surgery? *Minerva Anesthesiol* **71**, 21-25
16. Pryor, K. O., Fahey, T. J., 3rd, Lien, C. A., and Goldstein, P. A. (2004) Surgical site infection and the routine use of perioperative hyperoxia in a general surgical population: a randomized controlled trial. *JAMA* **291**, 79-87
17. Gardella, C., Goltra, L. B., Laschansky, E., Drolette, L., Magaret, A., Chadwick, H. S., and Eschenbach, D. (2008) High-concentration supplemental perioperative oxygen to reduce the incidence of postcesarean surgical site infection: a randomized controlled trial. *Obstet Gynecol* **112**, 545-552
18. Allegranzi, B., Zayed, B., Bischoff, P., Kubilay, N. Z., de Jonge, S., de Vries, F., Gomes, S. M., Gans, S., Wallert, E. D., Wu, X., Abbas, M., Boermeester, M. A., Dellinger, E. P., Egger, M., Gastmeier, P., Guirao, X., Ren, J., Pittet, D., Solomkin, J. S., and Group, W. H. O. G. D. (2016) New WHO recommendations on intraoperative and postoperative measures for surgical site infection prevention: an evidence-based global perspective. *Lancet Infect Dis* **16**, e288-e303
19. Wetterslev, J., Meyhoff, C. S., Jorgensen, L. N., Gluud, C., Lindschou, J., and Rasmussen, L. S. (2015) The effects of high perioperative inspiratory oxygen fraction for adult surgical patients. *Cochrane Database Syst Rev*, CD008884
20. Girardis, M., Busani, S., Damiani, E., Donati, A., Rinaldi, L., Marudi, A., Morelli, A., Antonelli, M., and Singer, M. (2016) Effect of Conservative vs Conventional Oxygen Therapy on Mortality Among Patients in an Intensive Care Unit: The Oxygen-ICU Randomized Clinical Trial. *JAMA* **316**, 1583-1589
21. Stub, D., Smith, K., Bernard, S., Nehme, Z., Stephenson, M., Bray, J. E., Cameron, P., Barger, B., Ellims, A. H., Taylor, A. J., Meredith, I. T., Kaye, D. M., and Investigators, A. (2015) Air Versus Oxygen in ST-Segment-Elevation Myocardial Infarction. *Circulation* **131**, 2143-2150
22. Fonnes, S., Gogenur, I., Sondergaard, E. S., Siersma, V. D., Jorgensen, L. N., Wetterslev, J., and Meyhoff, C. S. (2016) Perioperative hyperoxia - Long-term impact on cardiovascular complications after abdominal surgery, a post hoc analysis of the PROXI trial. *Int J Cardiol* **215**, 238-243
23. Meyhoff, C. S., Jorgensen, L. N., Wetterslev, J., Siersma, V. D., Rasmussen, L. S., and Group, P. T. (2014) Risk of new or recurrent cancer after a high perioperative inspiratory oxygen fraction during abdominal surgery. *Br J Anaesth* **113** **Suppl 1**, i74-i81
24. Staehr-Rye, A. K., Meyhoff, C. S., Scheffenbichler, F. T., Vidal Melo, M. F., Gatke, M. R., Walsh, J. L., Ladha, K. S., Grabitz, S. D., Nikolov, M. I., Kurth, T., Rasmussen, L. S., and Eikermann, M. (2017) High intraoperative inspiratory oxygen fraction and risk of major respiratory complications. *Br J Anaesth* **119**, 140-149
25. Hofmann, R., James, S. K., Jernberg, T., Lindahl, B., Erlinge, D., Witt, N., Arefalk, G., Frick, M., Alfredsson, J., Nilsson, L., Ravn-Fischer, A., Omerovic, E., Kellerth, T., Sparv, D., Ekelund, U., Linder, R., Ekstrom, M., Lauermann, J., Haaga, U., Pernow, J., Ostlund, O., Herlitz, J., Svensson, L., and Investigators, D. X. S. (2017) Oxygen Therapy in Suspected Acute Myocardial Infarction. *N Engl J Med* **377**, 1240-1249
26. Ad-hoc working group of, E., Fliser, D., Laville, M., Covic, A., Fouque, D., Vanholder, R., Juillard, L., and Van Biesen, W. (2012) A European Renal Best Practice (ERBP) position statement on the Kidney Disease Improving Global Outcomes (KDIGO) clinical practice guidelines on acute kidney injury: part 1: definitions, conservative management and contrast-induced nephropathy. *Nephrol Dial Transplant* **27**, 4263-4272
27. Keller, T., Zeller, T., Petzt, D., Tzikas, S., Roth, A., Czyz, E., Bickel, C., Baldus, S., Warnholtz, A., Frohlich, M., Sinning, C. R., Eleftheriadis, M. S., Wild, P. S., Schnabel,

- R. B., Lubos, E., Jachmann, N., Genth-Zotz, S., Post, F., Nicaud, V., Tiret, L., Lackner, K. J., Munzel, T. F., and Blankenberg, S. (2009) Sensitive troponin I assay in early diagnosis of acute myocardial infarction. *N Engl J Med* **361**, 868-877
28. Abbott, T. E. F., Fowler, A. J., Pelosi, P., Gama de Abreu, M., Moller, A. M., Canet, J., Creagh-Brown, B., Mythen, M., Gin, T., Lalu, M. M., Futier, E., Grocott, M. P., Schultz, M. J., Pearse, R. M., and St, E. P. C. G. (2018) A systematic review and consensus definitions for standardised end-points in perioperative medicine: pulmonary complications. *Br J Anaesth* **120**, 1066-1079
29. Jammer, I., Wickboldt, N., Sander, M., Smith, A., Schultz, M. J., Pelosi, P., Leva, B., Rhodes, A., Hoeft, A., Walder, B., Chew, M. S., Pearse, R. M., European Society of, A., the European Society of Intensive Care, M., European Society of, A., and European Society of Intensive Care, M. (2015) Standards for definitions and use of outcome measures for clinical effectiveness research in perioperative medicine: European Perioperative Clinical Outcome (EPCO) definitions: a statement from the ESA-ESICM joint taskforce on perioperative outcome measures. *Eur J Anaesthesiol* **32**, 88-105
30. Ladha, K., Vidal Melo, M. F., McLean, D. J., Wanderer, J. P., Grabitz, S. D., Kurth, T., and Eikermann, M. (2015) Intraoperative protective mechanical ventilation and risk of postoperative respiratory complications: hospital based registry study. *BMJ* **351**, h3646
31. Kheterpal, S., Vaughn, M. T., Dubovoy, T. Z., Shah, N. J., Bash, L. D., Colquhoun, D. A., Shanks, A. M., Mathis, M. R., Soto, R. G., Bardia, A., Bartels, K., McCormick, P. J., Schonberger, R. B., and Saager, L. (2020) Sugammadex versus Neostigmine for Reversal of Neuromuscular Blockade and Postoperative Pulmonary Complications (STRONGER): A Multicenter Matched Cohort Analysis. *Anesthesiology* **132**, 1371-1381
32. Agency for Healthcare Research and Quality, U. S. D. o. H. a. H. S. (2017) Patient Safety Indicator 11 (PSI 11) Postoperative Respiratory Failure Rate. [www.qualityindicators.ahrq.gov](http://www.qualityindicators.ahrq.gov)
33. Agency for Healthcare Research and Quality, U. S. D. o. H. a. H. S. (2018) Patient Safety Indicator 11 (PSI 11) Postoperative Respiratory Failure Rate. [www.qualityindicators.ahrq.gov](http://www.qualityindicators.ahrq.gov)
34. Moore, B. J., White, S., Washington, R., Coenen, N., and Elixhauser, A. (2017) Identifying Increased Risk of Readmission and In-hospital Mortality Using Hospital Administrative Data: The AHRQ Elixhauser Comorbidity Index. *Med Care* **55**, 698-705
